# Supplementary material for: Stable organic radical qubits and their applications in quantum information science
Source: PubMed Central journal article supplement — Innovation (Camb). 2024 Jun 21;5(5):100662. doi: 10.1016/j.xinn.2024.100662 (PMC11292369; doi:10.1016/j.xinn.2024.100662), 2024-06-21
Supplement: mmc1.pdf [file mmc1.pdf]

**The Innovation, Volume 5**

**Supplemental Information**

**Stable organic radical qubits and their applications in quantum information science**

**Aimei Zhou, Zhecheng Sun, and Lei Sun**

## Supplemental Information

### Table of Contents

#### Characterization methods for $T_1$ , $T_m$ , and Rabi oscillations

#### Influence of the Larmor frequency on the electron spin dynamics of stable organic radical qubits

**Figure S1.** Schemes of triphenylmethyl radicals

**Figure S2.** Schemes of nitroxide radicals

**Figure S3.** Scheme of semiquinone radicals and macrocyclic conjugated radicals

**Figure S4.** Radicals based on graphene nanoribbons and carbon nanotubes

**Figure S5.** Bloch sphere illustrations of spin dynamics and spin manipulation

**Figure S6.** Schemes of pulse sequences

**Figure S7.** Influence of solvent deuteration on  $1/T_1$

**Figure S8.** Influence of Larmor frequency on spin dynamics

**Table S1.** The equation of typical spin relaxation mechanisms

**Table S2.**  $T_1$  and  $T_m$  of stable organic radical qubits

**Table S3.**  $T_1$  and  $T_m$  of stable organic radical qubits integrated in solid-state systems

## Triphenylmethyl radicals

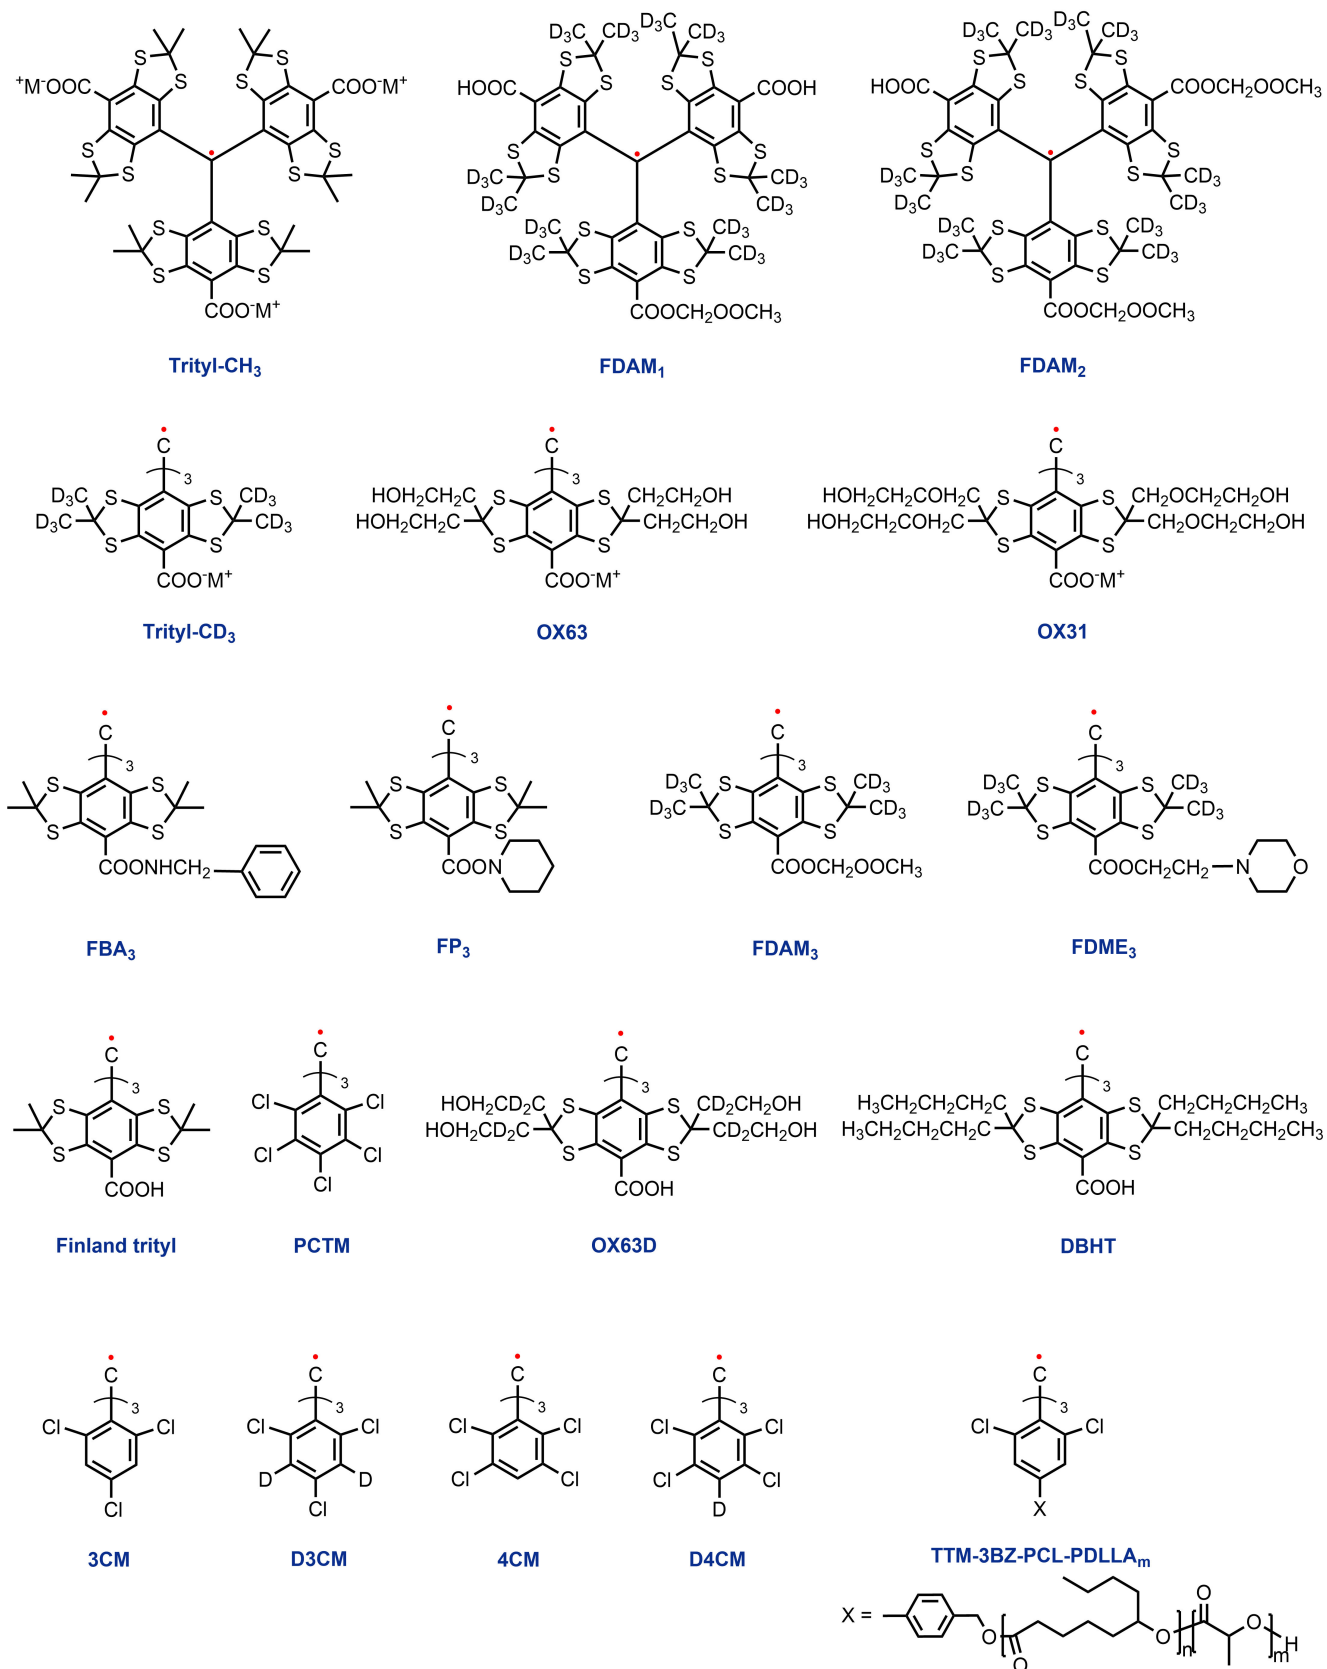

Figure S1. Schemes of triphenylmethyl radicals

## Nitroxide radicals

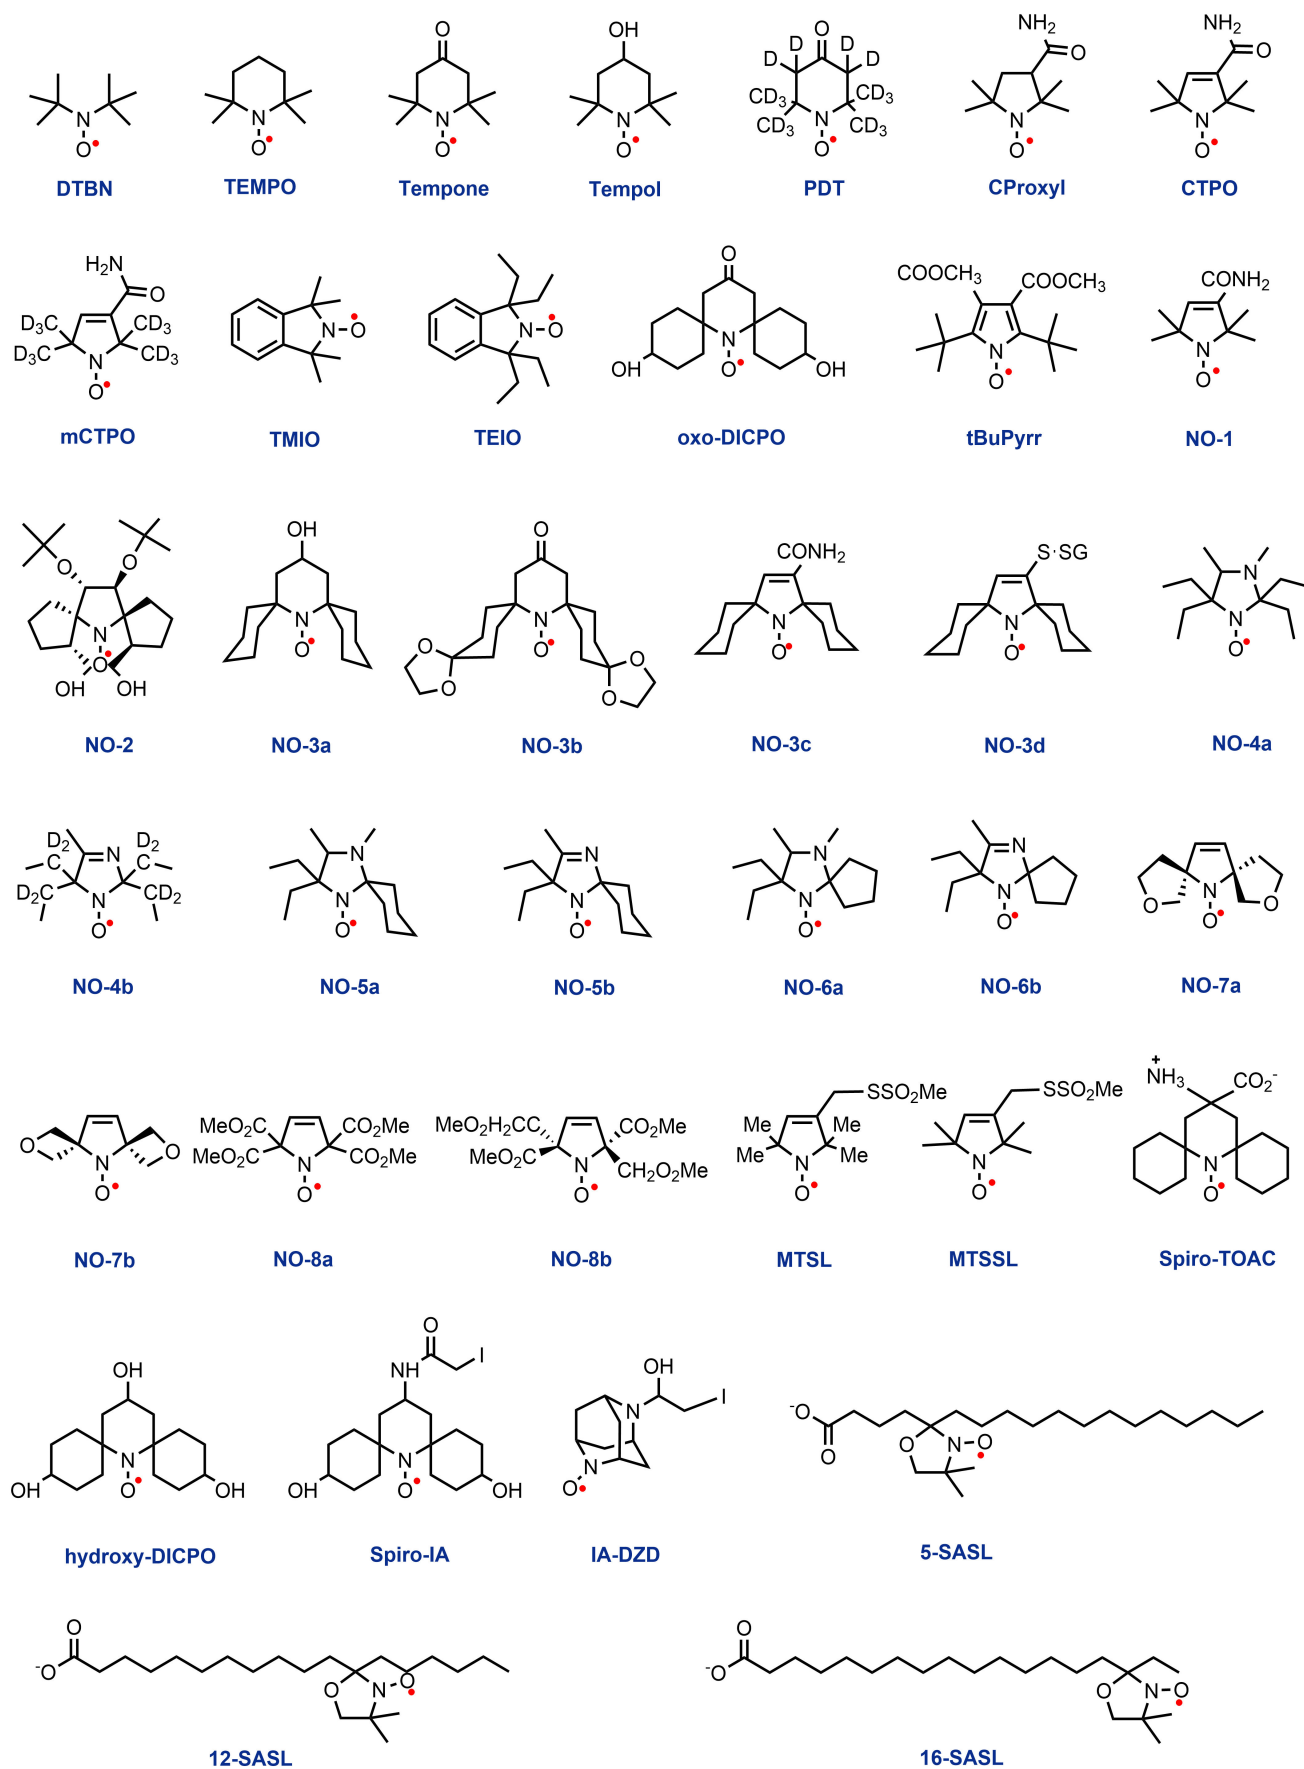

Figure S2. Schemes of nitroxide radicals

## Semiquinone radicals

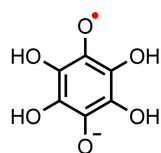

THSQ

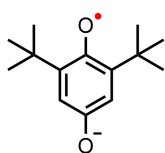

2,6-DTBSQ

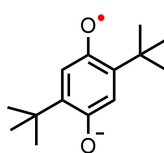

2,5-DTBSQ

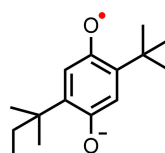

2,5-TASQ

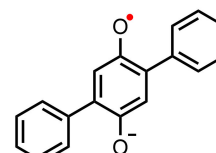

2,5-PSQ

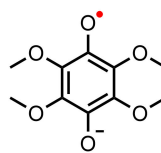

TMBSQ

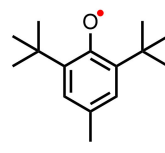

TTBP

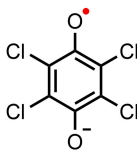

TCSQ

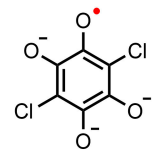

DDBSQ

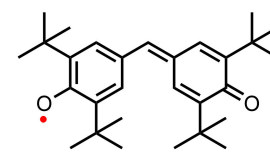

Galvinoxyl

## Macrocyclic conjugated radicals

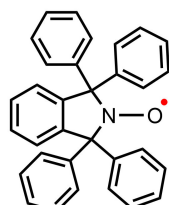

TPHIO

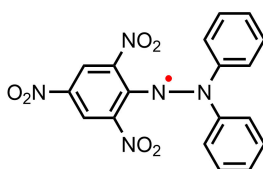

DPPH

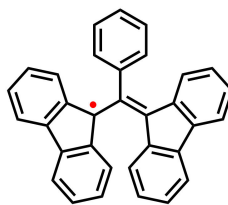

BDPA

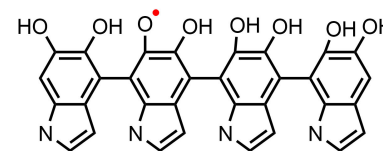

PDA

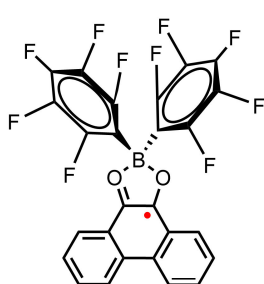

$(C_6F_5)_2B(O_2C_{14}H_8)$

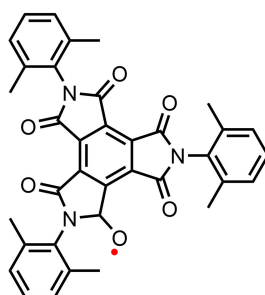

BTI-xy

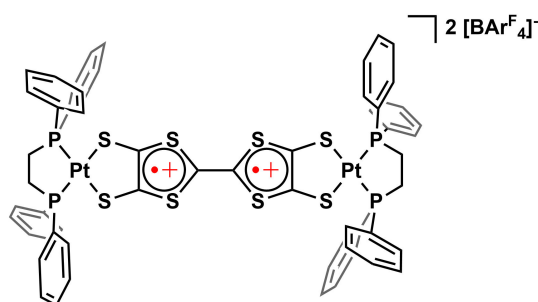

PtTTFtt

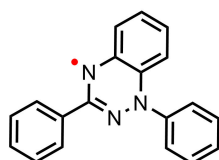

BTR

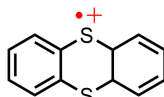

Thianthrene

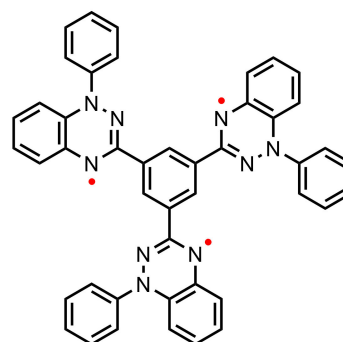

BTR-C<sub>3</sub>

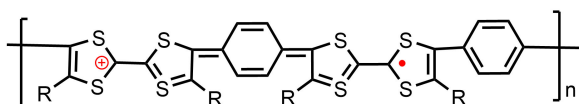

PTTF

Figure S3. Scheme of semiquinone radicals and macrocyclic conjugated radicals

## Graphene nanoribbons (GNRs) and carbon nanotubes

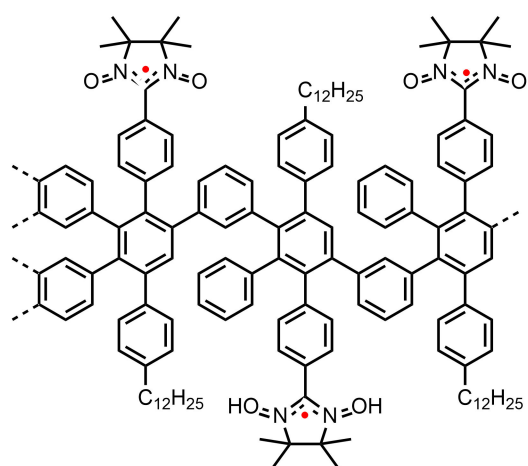

NIT-polyphenylene

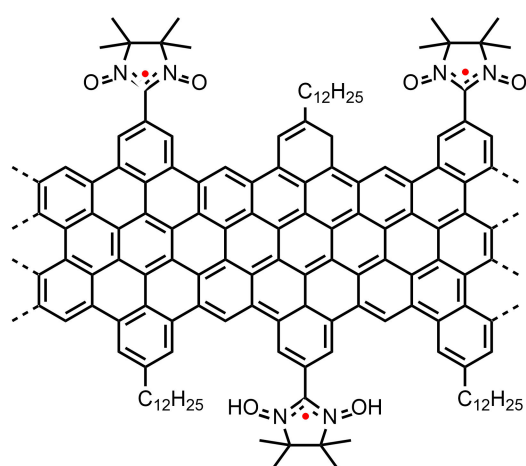

NIT-GNRs

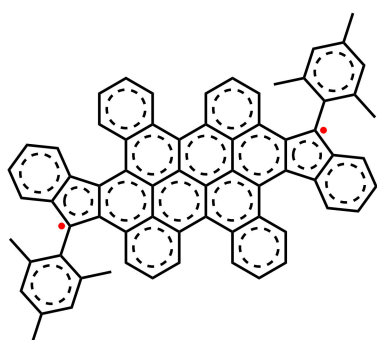

GNRs-1

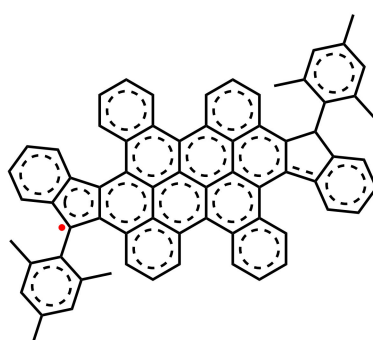

GNRs-2

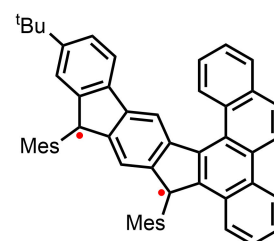

GNRs-3

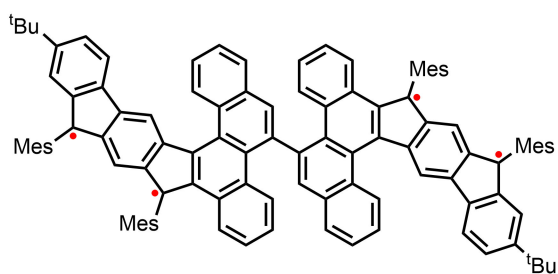

GNRs-4

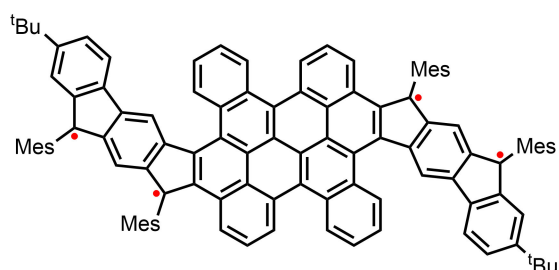

GNRs-5

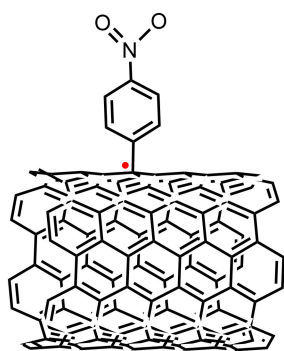

NO<sub>2</sub>Ph-SWCNTs

Figure S4. Radicals based on graphene nanoribbons and carbon nanotubes

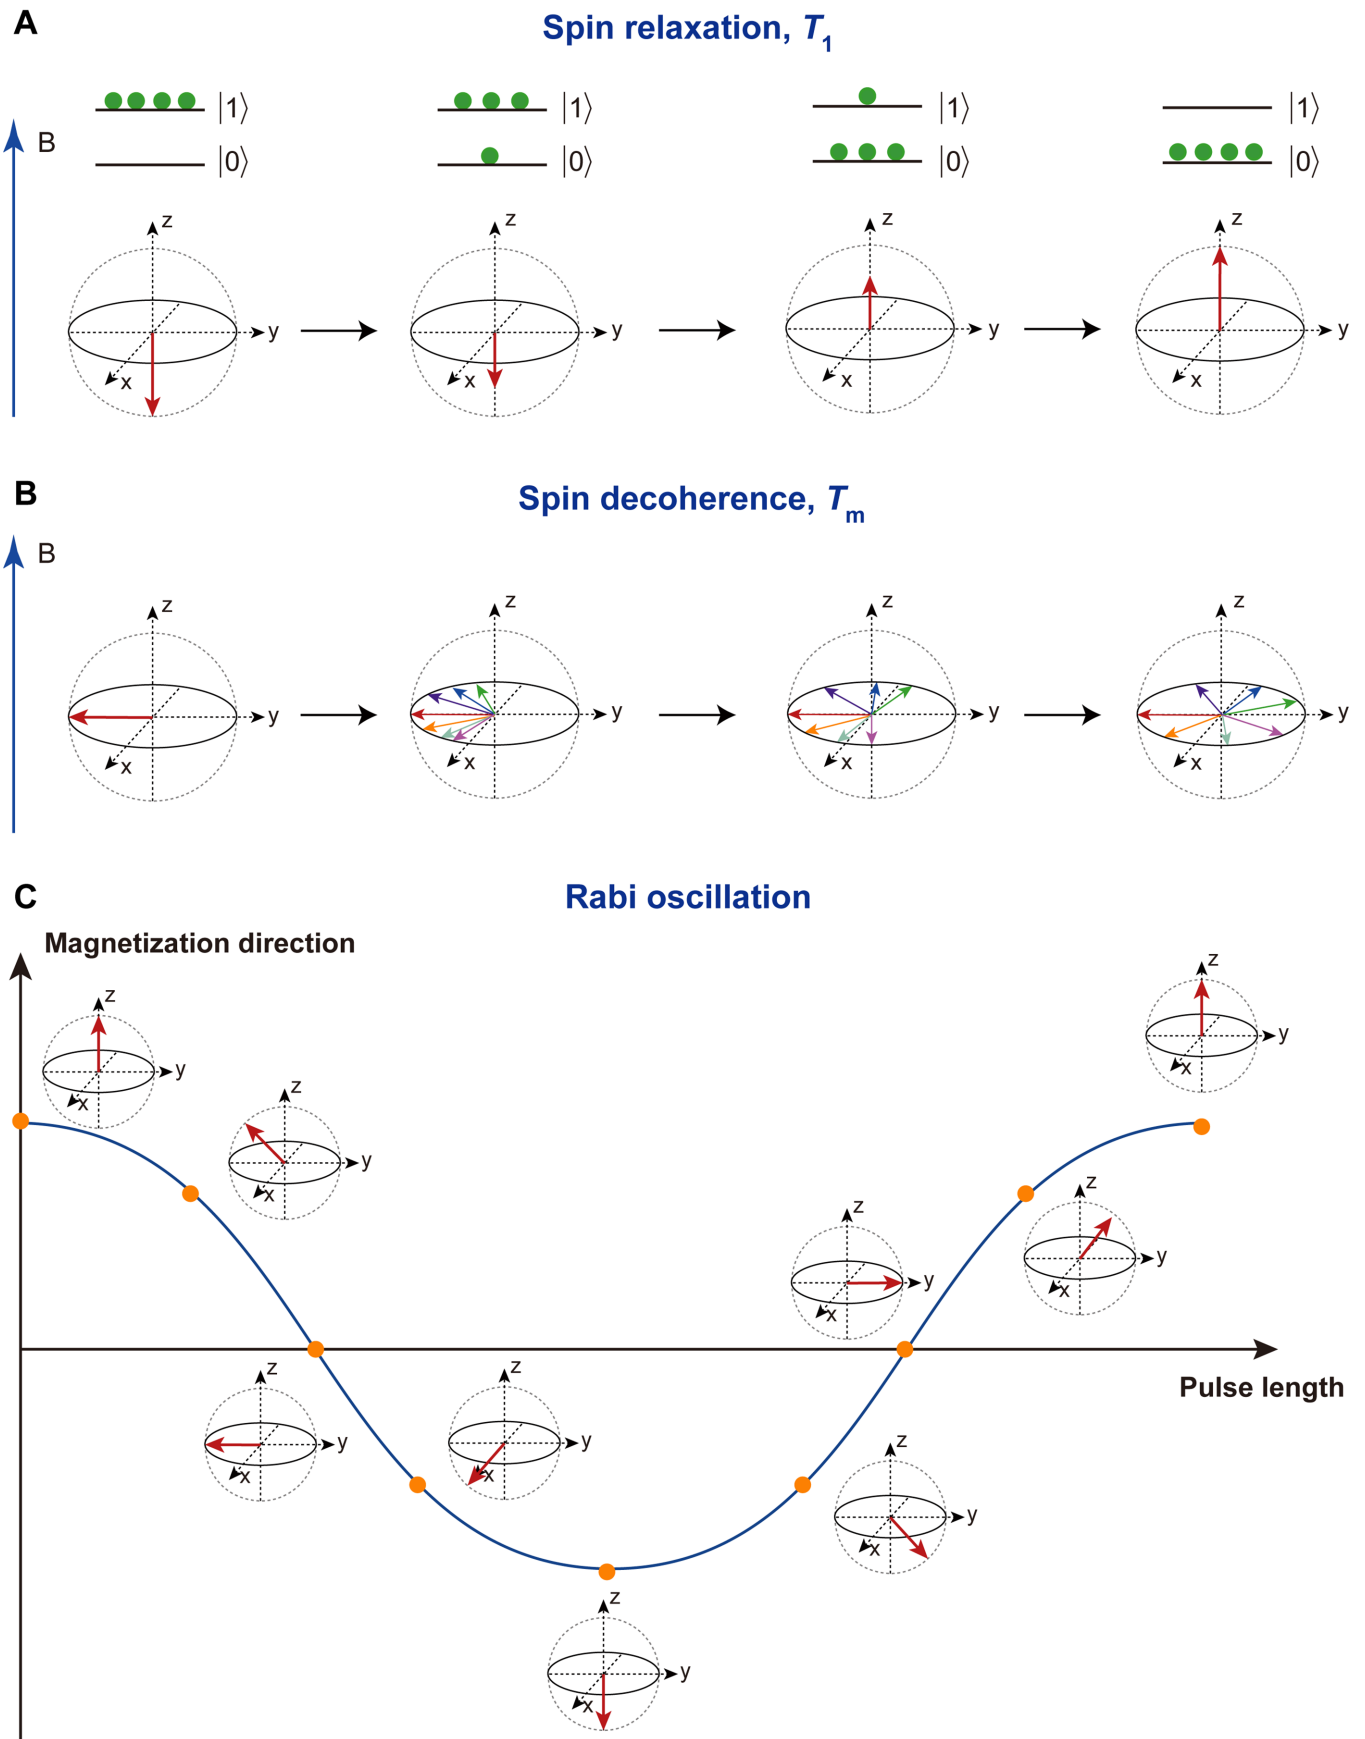

**Figure S5. Bloch sphere illustrations of spin dynamics and spin manipulation** (A) Spin relaxation process described by  $T_1$ . Green dots represent partitions of electron spins on  $|0\rangle$  and  $|1\rangle$  spin states. The blue arrow on the left marked with "B" represents the external magnetic field. (B) Spin decoherence process described by  $T_m$ . (C) Rabi oscillation.

## Characterization methods for $T_1$ , $T_m$ , and Rabi oscillations

Radical qubit characterization, including  $T_1$ ,  $T_m$ , and manipulability, relies on pulse electron paramagnetic resonance (EPR) spectroscopy. Pulse EPR spectroscopy initializes the electron spin using a static magnetic field via the Zeeman effect, manipulates it with transient oscillatory magnetic fields generated by a sequence of microwave pulses, and reads out the final state through free induction decays or spin echoes.  $T_1$  could be measured by inversion recovery or saturation recovery pulse sequences, which transform the spin to a nonequilibrium state and monitor the relaxation process (Figure S6C, D).  $T_m$  is most often characterized by a Hahn echo decay pulse sequence that generates a superposition state and monitors its decoherence during a free evolution period (Figure S6A).<sup>1,2</sup>  $T_m$  may be improved by dynamical decoupling strategies that suppress the influence of environmental magnetic noise.<sup>3,4</sup> The manipulability is demonstrated via Rabi oscillations, which show an oscillatory relationship between superposition and the duration of a nutation pulse (Figure S5C).<sup>5</sup> Practically, molecules displaying quantum coherence always show Rabi oscillations in nutation experiments (Figure S6B). Thus, a radical that exhibits long  $T_1$  and  $T_m$  could be qualified as a qubit.<sup>1,2</sup>

### A Hahn echo sequence

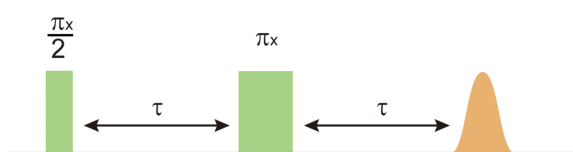

### B Nutation sequence

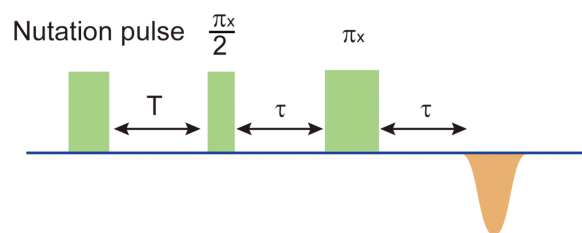

### C Inversion recovery sequence

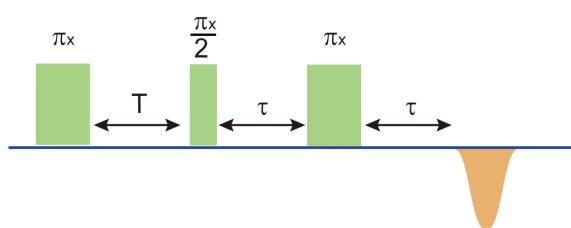

### D Saturation recovery sequence

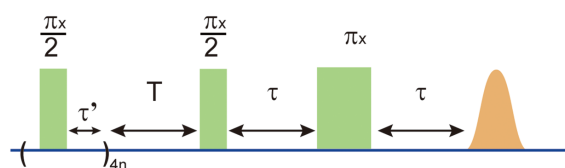

**Figure S6. Schemes of pulse sequences** (A) Hahn echo sequence. (B) Nutation sequence. (C) Inversion recovery sequence. (D) Saturation recovery sequence. Green rectangles represent pulses whose turning angles are marked above them, and orange objects represent spin echoes.



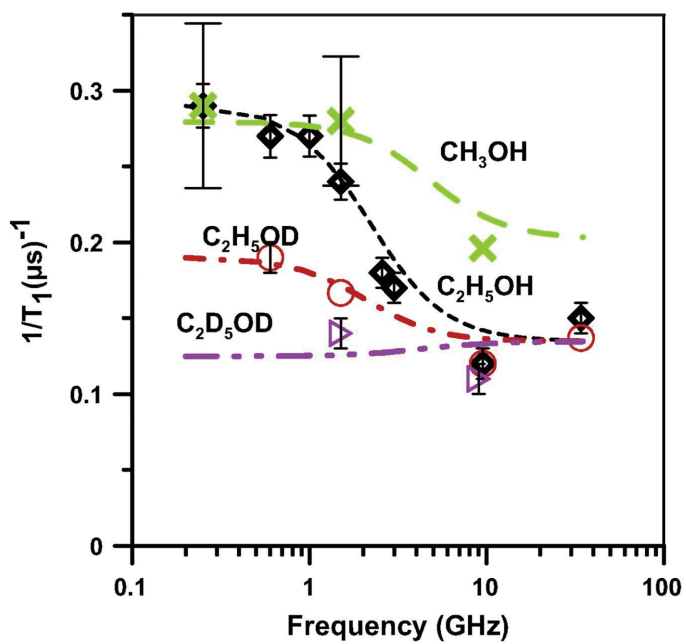

Figure S7. Influence of solvent deuteration on  $1/T_1$  (Reproduced from Ref. <sup>6</sup> with the permission from Elsevier, copyright 2014)

## Influence of the Larmor frequency on the electron spin dynamics of stable organic radical qubits

The Larmor frequency ( $\omega$ ) describes the frequency of spin precession in an external magnetic field ( $B$ ), which reflects the Zeeman splitting ( $E_Z$ ) dictated by the  $g$ -factor of spin system and the change of spin state ( $\Delta S$ ),

$$E_Z = \hbar\omega = g\mu_B B\Delta S$$

where  $\hbar$  is the reduced Planck constant,  $\mu_B$  is the Bohr magneton, and  $\Delta S$  is +1 for an organic mono-radical. In typical EPR experiments,  $\omega$  is fixed within a narrow range of frequency to match the resonant frequency of the microwave cavity. The resonant frequency is conventionally represented by the microwave band of the EPR instrument, with L-band centered at 1 GHz, S-band 3.5 GHz, X-band 9.8 GHz, Q-band 34 GHz, and W-band 94 GHz.

Electron spins with different Larmor frequencies might couple with different phonon modes, which in turn affects spin relaxation processes. Raman, Orbach, and local-mode processes typically involve phonons whose frequencies are well above the Larmor frequency of spin, so these processes are frequency-independent.<sup>1,2</sup> In contrast, direct and thermally activated processes that involve low-frequency phonons typically show significant frequency dependence. The former monotonically increases with rising Larmor frequency, whereas the latter has a maximum value that appears when  $\omega\tau_c = 1$  where  $\tau_c$  is the correlation time of the thermally activated process.<sup>7,8</sup> For example, for a nitroxide radical, PDT (Figure S2), dissolved in a mixture of water and glycerol,  $\tau_c = 1.0 \times 10^{-10}$  s. Hence, the thermally activated process is the most pronounced at the frequency  $\nu = \frac{\omega}{2\pi} = 1.6$  GHz. This is in good agreement with the experimental observation where  $1/T_1$  shows the maximum at 1.5 GHz (Figure S8B).<sup>7</sup>

As discussed in the main text, spin relaxation processes in fluid solution mainly include tumbling-induced spin rotation and modulation of anisotropic interactions comprising of  $g$ -anisotropy,  $A$ -anisotropy, and dipolar coupling with solvent nuclei.<sup>1</sup> According to the corresponding equation in Table S1, the spin rotation is independent of the Larmor frequency (Figure 5A), yet others are frequency-dependent (Figure 5B–D) and their salience is related to the tumbling correlation time ( $\tau_R$ ). For instance, Biller et al. acquired the room-temperature  $T_1$  of a series of nitroxide radicals at various frequencies (250 MHz to 34 GHz) in solutions whose  $\tau_R$  values range from 4 to 50 ps.<sup>8</sup> Take the PDT radical (Figure S2) as an example. When  $\tau_R$  is 4 ps, the spin relaxation is predominantly governed by spin rotation, rendering  $T_1$  independent of frequency ( $T_1 = 1.05 - 1.18$   $\mu$ s; Figure S8A). In contrast, as  $\tau_R$  exceeds 15 ps, the dominant process shifts towards  $g$ - and  $A$ -anisotropy modulations. Meanwhile, the thermally activated process exerts its most substantial influence on  $T_1$  within the frequency range of 1 – 2 GHz. Consequently, as  $\tau_R$  increases, the frequency-dependence of  $T_1$  becomes more and more salient. For example, when  $\tau_R$  is 50 ps,  $T_1$  drops from approximately 4.5  $\mu$ s at 250 MHz to approximately 0.28  $\mu$ s at 34 GHz.<sup>7</sup>

The frequency-dependence of  $T_m$  remains unclear. Shi *et al* found that the  $T_m$  of triphenylmethyl radicals only shows weak frequency-dependence within the range of 250 MHz – 1.5 GHz.<sup>9</sup> Biller *et al* showed that nitroxide radicals exhibit decreasing  $T_m$  with increasing frequency from 250 MHz to 34 GHz.<sup>7</sup> In contrast, Ghim *et al* observed that within the range of 1.8 – 19.4 GHz, the  $T_m$  of irradiated L- alanine radicals increases with increasing frequency.<sup>10</sup> From these observations, it seems that the frequency dependence of  $T_m$  may be different for different radicals and/or frequency ranges. A comprehensive and in-depth investigation into this phenomenon is needed.

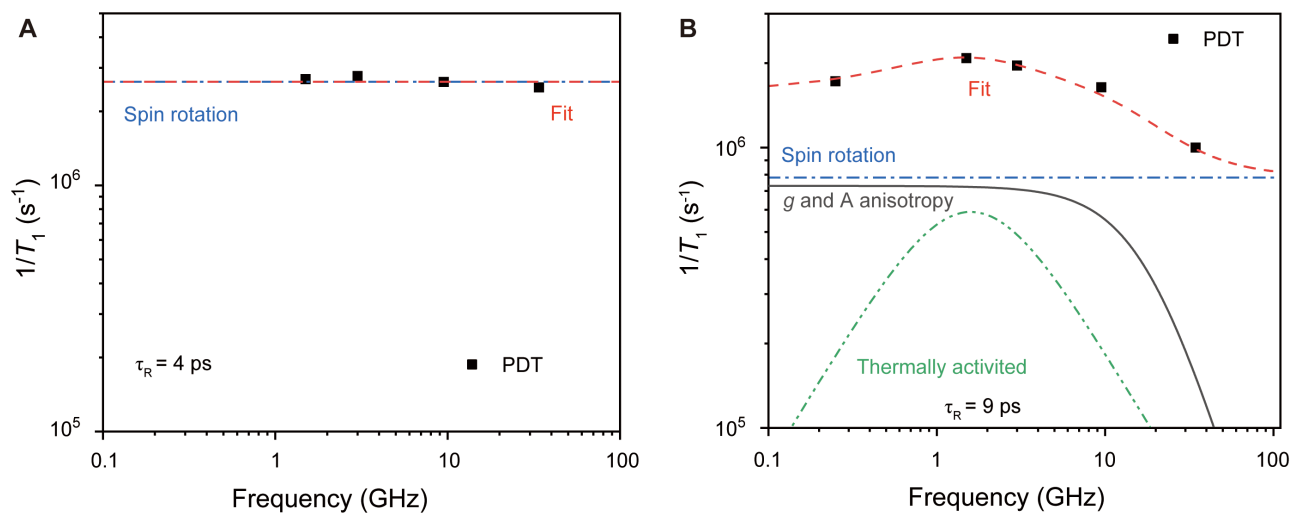

**Figure S8. Influence of Larmor frequency on spin dynamics** Frequency dependence of  $1/T_1$  for PDT in solvents whose  $\tau_R$  being (A) 4 ps and (B) 9 ps, respectively. Data used for these two simulations (black squares) are extracted from Ref<sup>8</sup> for (A) and Ref<sup>7</sup> for (B).

**Table S1. The equation of typical spin relaxation mechanisms<sup>1,11,12</sup>**

| Mechanism           | Equation                                                                                                                                                                                                                                                                                             |
|---------------------|------------------------------------------------------------------------------------------------------------------------------------------------------------------------------------------------------------------------------------------------------------------------------------------------------|
| Direct              | $A_{Dir} B^4 \frac{e^{\hbar\omega/k_B T}}{e^{\hbar\omega/k_B T} - 1}$                                                                                                                                                                                                                                |
| Raman               | $A_{Ram} \left(\frac{T}{\theta_D}\right)^9 \int_0^{\frac{\theta_D}{T}} x^8 \frac{e^x}{(e^x - 1)^2} dx \text{ (sometimes } A_{Ram} T^m \text{ with } m = 2 - 9)$                                                                                                                                      |
| Orbach              | $A_{Orb} \frac{\Delta^3}{e^{\Delta/k_B T} - 1}$                                                                                                                                                                                                                                                      |
| Local mode          | $A_{loc} \frac{e^{\hbar\omega_{phonon}/k_B T}}{(e^{\hbar\omega_{phonon}/k_B T} - 1)^2}$                                                                                                                                                                                                              |
| Thermally activated | $A_{therm} \frac{2\tau_c^0 e^{E_a/k_B T}}{1 + \omega^2 \tau_c^0{}^2 e^{2E_a/k_B T}}$                                                                                                                                                                                                                 |
| Tumbling-dependent  | $\frac{\sum_{i=x,y,z} (g_i - g_e)^2}{9\tau_R} + \frac{2}{5} \left(\frac{\mu_B \omega}{g \beta}\right)^2 \left\{ \frac{(\Delta g)^2}{3} + (\delta g)^2 \right\} J(\omega) + \frac{2}{9} I(I+1) \sum_i (A_i - a_{iso})^2 J(\omega) + C_{solvent} \frac{\tau_{solvent}}{1 + (\omega \tau_{solvent})^2}$ |
| Cross relaxation    | constant (temperature-independent)                                                                                                                                                                                                                                                                   |

$T$ : temperature;  $B$ : magnetic field strength;  $\omega$ : Larmor frequency;  $\theta_D$ : Debye temperature;  $\Delta$ : energy of low-lying excited state;  $\omega_{phonon}$ : energy of local phonon mode.  $\tau_c^0$ : pre-exponential factor;  $E_a$ : activation energy;  $g_i$ : principle  $g$  value along the  $i$  axis;  $g_e$ :  $g$  value of free electron;  $\tau_R$ : tumbling correlation time;  $\mu_B$ : Bohr magneton;  $\Delta g = g_{zz} - 0.5(g_{xx} + g_{yy})$ ;  $\delta g = 0.5(g_{xx} - g_{yy})$ ;  $J(\omega) = \frac{\tau_R}{1 + (\omega \tau_R)^2}$ ;  $I$ : nuclear spin;  $A_i$ : principle component of the nuclear hyperfine constant along the  $i$  axis in angular frequency units;  $a_{iso}$ : the isotropic nuclear hyperfine constant;  $\tau_{solvent}$ : correlation time for motion of the solvent relative to the radical;  $C_{solvent}$ : a function of the dipolar interaction with solvent nuclei.  $A_{Dir}$ ,  $A_{Ram}$ ,  $A_{Orb}$ ,  $A_{loc}$ ,  $A_{therm}$  are pre-factors.

**Table S2.  $T_1$  and  $T_m$  of stable organic radical qubits**

| Radical <sup>a</sup>              | Concentration / mmol·L <sup>-1</sup> | Frequency / GHz  | Solvent                              | Temperature / K  | $T_1$ / $\mu$ s   | $T_m$ / $\mu$ s | Reference |
|-----------------------------------|--------------------------------------|------------------|--------------------------------------|------------------|-------------------|-----------------|-----------|
| Trityl-CH <sub>3</sub>            | 0.2                                  | 9.5              | H <sub>2</sub> O : glycerol = 1:1    | 100              | 1060              | 3.9             | 13        |
|                                   |                                      |                  |                                      | 294              | 16                | 2.2             | 14        |
|                                   |                                      |                  | H <sub>2</sub> O : glycerol = 1:9    | 294              | 17                | 0.18            |           |
|                                   |                                      | H <sub>2</sub> O | 294                                  | 15               | 8.7               | 13              |           |
|                                   |                                      | 95               | H <sub>2</sub> O : glycerol = 1:1    | 100              | 838               |                 | 3.1       |
|                                   |                                      |                  |                                      | 294              | 17                |                 | 3.7       |
| H <sub>2</sub> O : glycerol = 1:9 | 294                                  |                  | 19                                   | 0.24             |                   |                 |           |
| Trityl-CD <sub>3</sub>            | 0.2                                  | 9.5              | H <sub>2</sub> O : glycerol = 1:1    | 100              | 756               | 4.5             | 13        |
|                                   |                                      |                  |                                      | 294              | 15                | 4.2             | 14        |
|                                   |                                      |                  | H <sub>2</sub> O : glycerol = 1:9    | 294              | 18                | 0.21            |           |
|                                   |                                      | H <sub>2</sub> O | 294                                  | 14               | 12.5              | 14              |           |
|                                   |                                      | 1.5              | H <sub>2</sub> O : glycerol = 1:1    | 294              | 16                |                 | 3.8       |
|                                   |                                      |                  |                                      | H <sub>2</sub> O | 294               |                 | 16        |
| 3.1                               | H <sub>2</sub> O : glycerol = 1:1    |                  | 294                                  | 16               | 13                |                 |           |
|                                   | H <sub>2</sub> O                     | 294              | 16                                   | 13               |                   |                 |           |
| Finland trityl                    | 2.5                                  | 9.5              | H <sub>2</sub> O : glycerol = 4:6    | 77               | 1670 <sup>b</sup> | NA <sup>c</sup> | 15        |
|                                   |                                      | 95               |                                      |                  | 1100 <sup>b</sup> |                 |           |
| OX63                              | 0.2                                  | 9.5              | H <sub>2</sub> O : glycerol = 1:1    | 100              | 1200              | 5.1             | 13        |
|                                   |                                      | 95               |                                      |                  | 979               | 4.5             | 13        |
| OX31                              | 0.2                                  | 9.5              | H <sub>2</sub> O : glycerol = 1:1    | 100              | 1360              | 5.0             | 13        |
|                                   |                                      | 95               |                                      |                  | 1042              | 4.4             | 13        |
| FDAM <sub>1</sub>                 | NA <sup>c</sup>                      | 9.5              | MeOH                                 | 300              | 14.3              | 7.6             | 16        |
|                                   |                                      | 34               |                                      |                  | 12.6              | 2.8             |           |
|                                   |                                      | 9.5              | H <sub>2</sub> O                     | 300              | 14.5              | 10.1            |           |
|                                   |                                      | 34               |                                      |                  | NA <sup>c</sup>   | 4.7             |           |
| FDAM <sub>2</sub>                 | NA <sup>c</sup>                      | 9.5              | MeOH                                 | 300              | 11.6              | 8.1             | 16        |
|                                   |                                      | 34               |                                      |                  | 11.6              | 4.9             |           |
|                                   |                                      | 9.5              | CH <sub>2</sub> Cl <sub>2</sub>      | 300              | 12.3              | 9.6             |           |
|                                   |                                      | 34               |                                      |                  | 11.3              | 6.7             |           |
|                                   |                                      | 9.5              | CHCl <sub>3</sub>                    | 300              | 11.0              | 8.6             |           |
|                                   |                                      | 34               |                                      |                  | 10.0              | 5.6             |           |
|                                   |                                      | 9.5              | CH <sub>2</sub> ClCH <sub>2</sub> Cl | 300              | 10.5              | 6.0             |           |
|                                   |                                      | 34               |                                      |                  | 10.3              | 4.3             |           |
|                                   |                                      | 9.5              | CH <sub>3</sub> CH <sub>2</sub> OH   | 300              | 10.1              | 6.0             |           |
|                                   |                                      | 34               |                                      |                  | 10.0              | 3.1             |           |
|                                   |                                      | 9.5              | Tert-butanol                         | 300              | 11.7              | 4.0             |           |
|                                   |                                      | 34               |                                      |                  | 12.2              | 1.4             |           |
| FDAM <sub>3</sub>                 | NA <sup>c</sup>                      | 9.5              | MeOH                                 | 300              | 11.1              | 8.3             | 16        |
|                                   |                                      | 34               |                                      |                  | 9.7               | 5.6             |           |
|                                   |                                      | 9.5              | CHCl <sub>3</sub>                    | 300              | 9.9               | 8.4             |           |
|                                   |                                      | 34               |                                      |                  | 9.6               | 6.0             |           |
| OX63D                             | 1                                    | 9.5              | H <sub>2</sub> O : glycerol = 4:6    | 77               | 3334 <sup>b</sup> | NA <sup>c</sup> | 15        |
|                                   |                                      | 95               |                                      |                  | 5000 <sup>b</sup> |                 |           |
| OX63D                             | NA <sup>c</sup>                      | 9.5              | MeOH                                 | 300              | 16.5              | 5.8             | 16        |
|                                   |                                      | 34               |                                      |                  | 15.6              | 1.8             |           |
|                                   |                                      | 9.5              | H <sub>2</sub> O                     | 300              | 16.0              | 7.3             |           |
|                                   |                                      | 34               |                                      |                  | 15.3              | 2.2             |           |
|                                   |                                      | 9.5              | D <sub>2</sub> O                     | 300              | 16.1              | 7.6             |           |
|                                   |                                      | 34               |                                      |                  | 16.1              | 2.0             |           |
| DBT                               | NA <sup>c</sup>                      | 9.5              | MeOH                                 | 300              | 14.9              | 5               | 16        |
|                                   |                                      | 34               |                                      |                  | 14.3              | 2.1             |           |

|                                                                                                 |                 |                 |                                                 |                     |                    |                   |    |
|-------------------------------------------------------------------------------------------------|-----------------|-----------------|-------------------------------------------------|---------------------|--------------------|-------------------|----|
| FBA <sub>3</sub>                                                                                | NA <sup>c</sup> | 9.5             | MeOH                                            | 300                 | 19.5               | 6.5               | 16 |
|                                                                                                 |                 | 34              |                                                 |                     | 19.2               | 3.6               |    |
|                                                                                                 |                 | 9.5             | CHCl <sub>3</sub>                               | 300                 | 18.0               | 7.2               |    |
|                                                                                                 |                 | 34              |                                                 |                     | 17.6               | 4.5               |    |
| FP <sub>3</sub>                                                                                 | NA <sup>c</sup> | 9.5             | MeOH                                            | 300                 | 23.0               | 5.0               | 16 |
|                                                                                                 |                 | 34              |                                                 |                     | 23.0               | 2.8               |    |
|                                                                                                 |                 | 9.5             | CHCl <sub>3</sub>                               | 300                 | 26.4               | 4.5               |    |
|                                                                                                 |                 | 34              |                                                 |                     | 25.7               | 2.3               |    |
| FDME <sub>3</sub>                                                                               | NA <sup>c</sup> | 9.5             | MeOH                                            | 300                 | 12.2               | 8.5               | 16 |
|                                                                                                 |                 | 34              |                                                 |                     | 11.2               | 5.4               |    |
|                                                                                                 |                 | 9.5             | CHCl <sub>3</sub>                               | 300                 | 11.4               | 9.1               |    |
|                                                                                                 |                 | 34              |                                                 |                     | 11.2               | 5.4               |    |
| BDPA                                                                                            | 0.0007          | 9.5             | Toluene                                         | Ambient temperature | 12 <sup>b</sup>    | 9.8 <sup>b</sup>  | 17 |
| DPPH                                                                                            | 0.012           | 9.5             | Toluene                                         | Ambient temperature | 2.0 <sup>b</sup>   | 1.3 <sup>b</sup>  | 17 |
| Galvinoxyl                                                                                      | 0.0028          | 9.5             | Toluene                                         | Ambient temperature | 2.8 <sup>b</sup>   | 2.1 <sup>b</sup>  | 17 |
| Thianthrene                                                                                     | < 0.5           | 9.5             | TFA                                             | Ambient temperature | 0.4 <sup>b</sup>   | 0.4 <sup>b</sup>  | 17 |
| mCTPO                                                                                           | 0.25            | 9.5             | H <sub>2</sub> O                                | Ambient temperature | 0.53               | 0.67              | 17 |
| PDT                                                                                             | 0.25            | 9.5             | H <sub>2</sub> O                                | Ambient temperature | 0.56               | 0.59              | 17 |
| 2,5-DTBSQ                                                                                       | 0.3             | 9.5             | Ethanol                                         | Ambient temperature | 7.8 <sup>b</sup>   | 3.2 <sup>b</sup>  | 6  |
| 2,6-DTBSQ                                                                                       | 0.3             | 9.5             | Ethanol                                         | Ambient temperature | 6.67 <sup>b</sup>  | NA <sup>c</sup>   |    |
| TMBSQ                                                                                           | 0.3             | 9.5             | Ethanol                                         | Ambient temperature | 5.56 <sup>b</sup>  |                   |    |
| TEMPO                                                                                           | 1.0             | 9.5             | H <sub>2</sub> O : glycerol = 1:1               | 295 <sup>b</sup>    | 2.00 <sup>b</sup>  | NA <sup>c</sup>   |    |
| Tempone                                                                                         | 0.3             | 9.5             | H <sub>2</sub> O : glycerol = 1:1               | 100                 | 100 <sup>b</sup>   | 5 <sup>b</sup>    | 19 |
| Tempol                                                                                          | 3               | 9.5             | Sucrose octaacetate                             | 298 <sup>b</sup>    | 19.95 <sup>b</sup> | NA <sup>c</sup>   | 20 |
| DTBN                                                                                            | 3               | 9.5             | Sucrose octaacetate                             | 250 <sup>b</sup>    | 5.6 <sup>b</sup>   | 0.40 <sup>b</sup> |    |
| TEIO                                                                                            | 3               | 9.5             | Sucrose octaacetate                             | 300 <sup>b</sup>    | 25.12 <sup>b</sup> | 0.63 <sup>b</sup> |    |
| TMIO                                                                                            | 3               | 9.5             | Sucrose octaacetate                             | 300 <sup>b</sup>    | NA <sup>c</sup>    | 1.26 <sup>b</sup> |    |
| TPHIO                                                                                           | 3               | 9.5             | Sucrose octaacetate                             | 298 <sup>b</sup>    | 56.23 <sup>b</sup> | 2.51 <sup>b</sup> | 21 |
| CTPO                                                                                            | 3               | 9.5             | Sucrose octaacetate                             | 273 <sup>b</sup>    | 15.85 <sup>b</sup> | 1.58              |    |
| tBuPyrr                                                                                         | 3               | 9.5             | Sucrose octaacetate                             | 273 <sup>b</sup>    | NA <sup>c</sup>    | 0.63              |    |
| PCTM                                                                                            | 0.2-0.5         | 9.5             | Toluene : CHCl <sub>3</sub> = 4:1               | 298                 | 10 <sup>b</sup>    |                   |    |
| TCSQ                                                                                            | 0.2-0.5         | 9.5             | Triacetin : HMPA = 2:1                          | 298                 | 10 <sup>b</sup>    | NA <sup>c</sup>   | 21 |
| DDBSQ                                                                                           | 0.2-0.5         | 9.5             | H <sub>2</sub> O : glycerol = 1:1               | 298                 | 31.63 <sup>b</sup> |                   | 22 |
| TTBP                                                                                            | 0.53            | 9.1             | H <sub>2</sub> O : glycerol = 1:1               | 298                 | 10 <sup>b</sup>    | NA <sup>c</sup>   |    |
| THSQ                                                                                            | 0.5             | 9.5             | Ethanol : glycerol = 4:1                        | 298                 | 31.63 <sup>b</sup> |                   |    |
| 2,5-TASQ                                                                                        | 0.5             | 9.5             | Ethanol : glycerol = 4:1                        | 298                 | 10 <sup>b</sup>    | NA <sup>c</sup>   |    |
| 2,5-PSQ                                                                                         | 0.5             | 9.5             | Ethanol : glycerol = 4:1                        | 298                 | 10 <sup>b</sup>    |                   | 23 |
| PTTF                                                                                            | powder          | NA <sup>c</sup> | NA <sup>c</sup>                                 | 300 <sup>b</sup>    | 1 <sup>b</sup>     | 0.5 <sup>b</sup>  |    |
| PtTTFt                                                                                          | 0.05            | 9.5             | DCM                                             | 298                 | 1.44 <sup>b</sup>  | 0.34 <sup>b</sup> | 25 |
| (C <sub>6</sub> F <sub>5</sub> ) <sub>2</sub> B(O <sub>2</sub> C <sub>14</sub> H <sub>8</sub> ) | 0.1             | 9.5             | Toluene : CH <sub>2</sub> Cl <sub>2</sub> = 9:1 | 100                 | 4600               | 2.6               | 26 |
| BTI-xy                                                                                          | 0.2             | 9.5             | DMF : benzene = 1:1                             | 10                  | 6000 <sup>b</sup>  | 1.3 <sup>b</sup>  | 27 |
| BTR-C <sub>3</sub>                                                                              | 1               | 9.5             | 2-Methyltetrahydrofuran                         | 5                   | 1098               | 6.8               | 28 |
|                                                                                                 |                 |                 |                                                 | 110                 | 23                 | 2.8               |    |
| PDA                                                                                             | NA <sup>c</sup> | 9.5             | powder                                          | 5                   | 46900              | 0.77              | 29 |
| hydroxyl-DICPO                                                                                  | NA <sup>c</sup> | 9.5             | H <sub>2</sub> O : glycerol = 1:1               | 100                 | 400 <sup>b</sup>   | 3.2 <sup>b</sup>  | 30 |
| oxo-DICPO                                                                                       | NA <sup>c</sup> | 9.5             | H <sub>2</sub> O : glycerol = 1:1               | 100                 | 400 <sup>b</sup>   | 3.2 <sup>b</sup>  |    |
| IA-DZD                                                                                          | NA <sup>c</sup> | 35              | H <sub>2</sub> O : glycerol = 1:1               | 80                  | 580                | 2.7               | 31 |
| NO-1                                                                                            | NA <sup>c</sup> | 9.5             | Dried trehalose                                 | Room temperature    | 12                 | 0.735             | 32 |
| NO-2                                                                                            |                 |                 |                                                 |                     | 30                 | 0.730             |    |
| NO-3a                                                                                           |                 |                 |                                                 |                     | 17                 | 0.750             |    |

|                   |                 |                                     |                                   |                                      |                                     |                                      |                   |    |
|-------------------|-----------------|-------------------------------------|-----------------------------------|--------------------------------------|-------------------------------------|--------------------------------------|-------------------|----|
| NO-3b             |                 |                                     |                                   |                                      |                                     | 17                                   | 0.730             |    |
| NO-3c             |                 |                                     |                                   |                                      |                                     | 21                                   | 0.8               |    |
| NO-3d             |                 |                                     |                                   |                                      |                                     | 22                                   | 0.630             |    |
| NO-4a             |                 |                                     |                                   |                                      |                                     | 18                                   | 0.680             |    |
| NO-4b             |                 |                                     |                                   |                                      |                                     | 14                                   | 0.650             |    |
| NO-5a             |                 |                                     |                                   |                                      |                                     | 18                                   | 0.640             |    |
| NO-5b             |                 |                                     |                                   |                                      |                                     | 16                                   | 0.740             |    |
| NO-6a             |                 |                                     |                                   |                                      |                                     | 23                                   | 0.655             |    |
| NO-6b             |                 |                                     |                                   |                                      |                                     | 16                                   | 0.730             |    |
| NO-7a             |                 |                                     |                                   |                                      |                                     |                                      | 0.50 <sup>b</sup> |    |
| NO-7b             | NA <sup>c</sup> | 9.5                                 | Trehalose : sucrose = 9:1         | Room temperature                     | NA <sup>c</sup>                     |                                      | 0.71 <sup>b</sup> | 33 |
| MTSL              |                 |                                     |                                   |                                      |                                     |                                      | 0.34 <sup>b</sup> |    |
| NO-8a             | NA <sup>c</sup> |                                     | Trehalose : sucrose = 9:1         | 295 <sup>b</sup>                     | 10 <sup>b</sup>                     | 1 <sup>b</sup>                       |                   | 34 |
| NO-8b             | NA <sup>c</sup> |                                     | Trehalose : sucrose = 9:1         | 295 <sup>b</sup>                     | 10 <sup>b</sup>                     | 1 <sup>b</sup>                       |                   |    |
| MTSSL             | NA <sup>c</sup> | 9.5                                 | H <sub>2</sub> O : glycerol = 1:1 | 240 <sup>b</sup><br>100 <sup>b</sup> | 10 <sup>b</sup><br>400 <sup>b</sup> | 0.1 <sup>b</sup><br>1 <sup>b</sup>   |                   | 35 |
| Spiro-TOAC        | NA <sup>c</sup> | 9.5                                 | H <sub>2</sub> O : glycerol = 1:1 | 240<br>100                           | NA <sup>c</sup>                     | 0.1 <sup>b</sup><br>3.2 <sup>b</sup> |                   |    |
| Spiro-IA          | NA <sup>c</sup> | 9.5                                 | H <sub>2</sub> O : glycerol = 1:1 | 100                                  | NA <sup>c</sup>                     | 3.16 <sup>b</sup>                    |                   | 36 |
| 5-SASL            | NA <sup>c</sup> | 2.54<br>3.45<br>9.2<br>18.5<br>34.6 | DMPC                              | 300                                  |                                     | 1.34<br>2.06<br>5.33<br>6.98<br>8.41 | NA <sup>c</sup>   | 37 |
| 12-SASL           | NA <sup>c</sup> | 2.54<br>3.45<br>9.2<br>18.5<br>34.6 | DMPC                              | 300                                  |                                     | 1.18<br>1.67<br>4.41<br>5.81<br>6.11 | NA <sup>c</sup>   | 37 |
| 16-SASL           | NA <sup>c</sup> | 2.54<br>3.45<br>9.2<br>18.5<br>34.6 | DMPC                              | 300                                  |                                     | 0.69<br>0.92<br>2.52<br>3.46<br>3.69 | NA <sup>c</sup>   | 37 |
| NIT-polyphenylene | NA <sup>c</sup> | 9.4                                 | Powder                            | 300 <sup>b</sup>                     |                                     | 1.43 <sup>b</sup>                    | 0.6 <sup>b</sup>  | 38 |
| NIT-GNRs          |                 |                                     |                                   |                                      |                                     | 1.43 <sup>b</sup>                    | 0.2 <sup>b</sup>  |    |
| GNRs-1            | NA <sup>c</sup> | 9.8                                 | Powder                            | Room temperature                     |                                     | 1 <sup>b</sup>                       | 0.3 <sup>b</sup>  |    |
|                   |                 |                                     |                                   | 5                                    |                                     | 100 <sup>b</sup>                     | NA <sup>c</sup>   |    |
|                   |                 |                                     | Toluene                           | 5                                    |                                     | 5000 <sup>b</sup>                    | 2 <sup>b</sup>    | 39 |
|                   |                 |                                     | d-Toluene                         | 5                                    |                                     | 10000 <sup>b</sup>                   | NA <sup>c</sup>   |    |
|                   |                 |                                     | CS <sub>2</sub>                   | 80 <sup>b</sup>                      |                                     | NA <sup>c</sup>                      | 100 <sup>b</sup>  |    |
| GNRs-2            | NA <sup>c</sup> | 9.8                                 | d-Toluene                         | 15 <sup>b</sup>                      |                                     | NA <sup>c</sup>                      | 10 <sup>b</sup>   | 39 |
|                   |                 |                                     | CS <sub>2</sub>                   | 10 <sup>b</sup>                      |                                     |                                      | 20 <sup>b</sup>   |    |
| GNRs-3            | NA <sup>c</sup> | 9.4                                 | Powder                            | 10 <sup>b</sup>                      |                                     | NA <sup>c</sup>                      | 1 <sup>b</sup>    |    |
|                   | 2±0.5           |                                     | Toluene                           |                                      |                                     | 100 <sup>b</sup>                     | 6 <sup>b</sup>    |    |
|                   | 2±0.5           |                                     | d-Toluene                         | 300 <sup>b</sup>                     |                                     | 83 <sup>b</sup>                      | 6 <sup>b</sup>    | 40 |
|                   | 2±0.5           |                                     | CS <sub>2</sub>                   |                                      |                                     | 83 <sup>b</sup>                      | 7 <sup>b</sup>    |    |
|                   | 2±0.5           |                                     | d <sub>14</sub> OTP               |                                      |                                     | 1000 <sup>b</sup>                    | 6 <sup>b</sup>    |    |
| GNRs-4            | NA <sup>c</sup> | 9.4                                 | Powder                            | 10 <sup>b</sup>                      |                                     | NA <sup>c</sup>                      | 0.2 <sup>b</sup>  |    |
|                   | 2±0.5           |                                     | Toluene                           | 300 <sup>b</sup>                     |                                     | 125 <sup>b</sup>                     | 4 <sup>b</sup>    | 40 |
|                   | 2±0.5           |                                     | d-Toluene                         |                                      |                                     | 100 <sup>b</sup>                     | 3 <sup>b</sup>    |    |

|                           |               |      |                             |         |               |         |    |
|---------------------------|---------------|------|-----------------------------|---------|---------------|---------|----|
|                           | $2 \pm 0.5$   |      | $\text{CS}_2$               |         | $100^b$       | $4^b$   |    |
|                           | $2 \pm 0.5$   |      | $\text{d}_{14}\text{OTP}$   |         | $1000^b$      | $2^b$   |    |
| GNRs-5                    | $\text{NA}^c$ | 9.4  | Powder                      | $10^b$  | $\text{NA}^c$ | $0.1^b$ | 40 |
|                           | $2 \pm 0.5$   |      | Toluene                     |         | $91^b$        | $5^b$   |    |
|                           | $2 \pm 0.5$   |      | d-Toluene                   | $300^b$ | $250^b$       | $5^b$   |    |
|                           | $2 \pm 0.5$   |      | $\text{CS}_2$               |         | $67^b$        | $5^b$   |    |
|                           | $2 \pm 0.5$   |      | $\text{d}_{14}\text{OTP}$   |         | $1000^b$      | $3^b$   |    |
| NO <sub>2</sub> Ph-SWCNTs | $\text{NA}^c$ | 9.5  | d-Toluene                   | 5       | 13000         | 1.2     | 41 |
| D3CM                      | $\text{NA}^c$ | 9.26 | Powder                      | $100^b$ | $800^b$       | $1^b$   | 42 |
|                           | $0.1$         |      | $\text{d}^8\text{-Toluene}$ | $298^b$ | $20^b$        | $1^b$   |    |
| 3CM                       | $\text{NA}^c$ |      | Powder                      | $100^b$ | $600^b$       | $0.7^b$ |    |
|                           | $0.1$         |      | $\text{d}^8\text{-Toluene}$ | $298^b$ | $15^b$        | $0.7^b$ |    |
| D4CM                      | $\text{NA}^c$ |      | Powder                      | $100^b$ | $1000^b$      | $2^b$   |    |
|                           | $0.1$         |      | $\text{d}^8\text{-Toluene}$ | $100^b$ | $300^b$       | $0.8^b$ |    |
| 4CM                       | $\text{NA}^c$ |      | Powder                      | $298^b$ | $60^b$        | $0.6^b$ |    |
|                           | $0.1$         |      | $\text{d}^8\text{-Toluene}$ | $100^b$ | $800^b$       | $4^b$   |    |
| 4CM                       | $\text{NA}^c$ |      | Powder                      | $100^b$ | $200^b$       | $0.2^b$ |    |
|                           | $0.1$         |      | $\text{d}^8\text{-Toluene}$ | $100^b$ | $1000^b$      | $1^b$   |    |

<sup>a</sup>Abbreviations are consistent with those in Figure S1-4; <sup>b</sup>value estimated from a figure in the reference; <sup>c</sup>not available.



**Table S3.  $T_1$  and  $T_m$  of stable organic radical qubits integrated in solid-state systems**

| Radical <sup>a</sup>               | Molar percentage  | Frequency / GHz | Temperature / K | $T_1$ / $\mu$ s    | $T_m$ / $\mu$ s    | Reference |    |
|------------------------------------|-------------------|-----------------|-----------------|--------------------|--------------------|-----------|----|
| C <sub>50</sub> -LA <sub>90</sub>  | 1% <sup>e</sup>   | 9.73            | 30              | 2102               | 0.186              | 43        |    |
|                                    |                   |                 | 298             | 25.02              | 0.148              |           |    |
| C <sub>50</sub> -LA <sub>140</sub> | 0.7% <sup>e</sup> | 9.73            | 30              | 3522               | 0.300              |           |    |
|                                    |                   |                 | 298             | 29.62              | 0.213              |           |    |
| C <sub>50</sub> -LA <sub>400</sub> | 0.4% <sup>e</sup> | 9.73            | 30              | 5173               | 0.377              |           |    |
|                                    |                   |                 | 298             | 29.23              | 0.318              |           |    |
| MgHOTP                             | 0.66%             | 9.4             | 296             | 10.55              | 0.153              |           | 44 |
|                                    |                   |                 | 296             | 21.61 <sup>b</sup> | 0.202 <sup>b</sup> |           |    |
| TAPPy-NDI                          | 0.01%             | 9.4             | 100             | 790                | 1.26               |           | 45 |
|                                    |                   |                 | 296             | 30.2               | 0.49               |           |    |
|                                    |                   |                 | 100             | 333                | 0.727              |           |    |
|                                    |                   |                 | 296             | 11.8               | 0.484              |           |    |
|                                    |                   |                 | 100             | 357                | 0.702              |           |    |
|                                    |                   |                 | 296             | 15                 | 0.397              |           |    |
|                                    |                   |                 | 100             | 257                | 0.448              |           |    |
|                                    |                   |                 | 296             | 11                 | 0.283              |           |    |
|                                    |                   |                 | 100             | 92.7               | 0.216              |           |    |
|                                    |                   |                 | 296             | 7.7                | 0.108              |           |    |
|                                    |                   |                 | 100             | 30.6               | 0.166              |           |    |
|                                    |                   |                 | 296             | 1.68               | 0.150              |           |    |
| Ni-HATI_iPr                        | 1%                | 9.7             | 100             | 3 <sup>c</sup>     | 0.09 <sup>c</sup>  | 46        |    |
| Ni-HATI_vPr                        | 0.3%              | 9.7             | 50              | 8 <sup>c</sup>     | 0.08 <sup>c</sup>  |           |    |
| Ni-HATI_nPr                        | 0.4%              | 9.7             | 100             | 2 <sup>c</sup>     | 0.07 <sup>c</sup>  |           |    |
| PTCM-Film                          | 0.1%              | 9.26            | 100             | 150 <sup>c</sup>   | 1.5 <sup>c</sup>   | 42        |    |
|                                    |                   |                 | 298             | 35.6               | 1.08               |           |    |
| TEMPO SAM                          | N/A <sup>d</sup>  | 9.47            | 10              | 9200               | 13.53              | 47        |    |
| BTEV-BTR                           | 1%                | 9               | 80              | 386                | 4.39               | 48        |    |
|                                    |                   |                 | 293             | 36                 | 2.30               |           |    |
|                                    |                   |                 | 293             | 29                 | 1.73               |           |    |
|                                    |                   |                 | 293             | 26                 | 1.43               |           |    |
|                                    |                   |                 | 80              | 75                 | 1.86               |           |    |
|                                    | 20%               |                 | 293             | 20                 | 0.98               |           |    |

<sup>a</sup>Abbreviations are consistent with those in corresponding references; <sup>b</sup>MgHOTP soaked in THF; <sup>c</sup>value estimated from a figure in the reference; <sup>d</sup>not available; <sup>e</sup>value estimated from the synthetic condition.

## References

1. Eaton, S.S., Eaton, G.R. (2018) Relaxation mechanisms. In *EPR Spectroscopy: Fundamentals and Methods*, Goldfarb, D., Stoll, S., ed. (Wiley), pp. 175–192.
2. Eaton, S.S., Eaton, G.R. (2000) Relaxation times of organic radicals and transition metal ions. In *Distance Measurements in Biological Systems by EPR*, Berliner, L. J., Eaton, G.R., Eaton, S.S., ed. (Kluwer Academic/Plenum Publishers), pp. 29–154.
3. Mirzoyan, R., Kazmierczak, N.P., Hadt, R.G. (2021). Deconvolving contributions to decoherence in molecular electron spin qubits: a dynamic ligand field approach. *Chem. Eur. J.* **27**: 9482–9494. DOI: 10.1002/chem.202100845.
4. Bhattacharyya, R., Chakraborty, I., Chakrabarti, A., et al. (2020). Recent studies on accurate measurements of NMR transverse relaxation times. *Annu. Rep. NMR Spectrosc.* **99**: 57–77. DOI: 10.1016/bs.arnmr.2019.09.001
5. Atzori, M., Sessoli, R. (2019). The second quantum revolution: role and challenges of molecular chemistry. *J. Am. Chem. Soc.* **141**: 11339–11352. DOI: 10.1021/jacs.9b00984.
6. Elajaili, H.B., Biller, J.R., Eaton, S.S., et al. (2014). Frequency dependence of electron spin–lattice relaxation for semiquinones in alcohol solutions. *J. Magn. Reson.* **247**: 81–87. DOI: 10.1016/j.jmr.2014.08.014.
7. Biller, J.R., Meyer, V.M., Elajaili, H., et al. (2012). Frequency dependence of electron spin relaxation times in aqueous solution for a nitronyl nitroxide radical and perdeuterated-tempone between 250 MHz and 34 GHz. *J. Magn. Reson.* **225**: 52–57. DOI: 10.1016/j.jmr.2012.10.002.
8. Biller, J.R., Elajaili, H., Meyer, V., et al. (2013). Electron spin–lattice relaxation mechanisms of rapidly-tumbling nitroxide radicals. *J. Magn. Reson.* **236**: 47–56. DOI: 10.1016/j.jmr.2013.08.006.
9. Shi, Y., Quine, R.W., Rinard, G.A., et al. (2017). Triarylmethyl radical: EPR signal to noise at frequencies between 250 MHz and 1.5 GHz and dependence of relaxation on radical and salt concentration and on frequency. *Z. Für Phys. Chem.* **231**: 923–937. DOI: 10.1515/zpch-2016-0813.
10. Ghim, B.T., Du, J.-L., Pfenninger, S., et al. (1996). Multifrequency electron paramagnetic resonance of irradiated L-alanine. *Appl. Radiat. Isot.* **47**: 1235–1239. DOI: 10.1016/s0969-8043(96)00037-1.
11. Kevan, L., Narayana, P.A. (1979) Disordered matrices. In *Multiple Electron Resonance Spectroscopy*, Dorio, M.M., Freed, J.H., ed. (Plenum Press), pp. 229–260.
12. Bowman, M.K., Norris, J.R. (1982). Cross relaxation of free radicals in partially ordered solids. *J. Phys. Chem.* **86**: 3385–3390. DOI: 10.1021/j100214a024.
13. Fielding, A.J., Carl, P.J., Eaton, G.R., et al. (2005). Multifrequency EPR of four triarylmethyl radicals. *Appl. Magn. Reson.* **28**: 231–238. DOI: 10.1007/BF03166758.
14. Yong, L., Harbridge, J., Quine, R.W., et al. (2001). Electron spin relaxation of triarylmethyl radicals in fluid solution. *J. Magn. Reson.* **152**: 156–161. DOI: 10.1006/jmre.2001.2379.
15. Chen, H., Maryasov, A.G., Rogozhnikova, O. Y., et al. (2016). Electron spin dynamics and spin–lattice relaxation of trityl radicals in frozen solutions. *Phys. Chem. Chem. Phys.* **18**: 24954–24965. DOI: 10.1039/c6cp02649d.

16. Kuzhelev, A.A., Trukhin, D.V., Krumkacheva, O.A., et al. (2015). Room-temperature electron spin relaxation of triarylmethyl radicals at the X- and Q- bands. *J. Phys. Chem. B* **119**: 13630–13640. DOI: 10.1021/acs.jpcc.5b03027.
17. Meyer, V., Eaton, S.S., Eaton, G.R. (2014). X-band electron spin relaxation times for four aromatic radicals in fluid solution and comparison with other organic radicals. *Appl. Magn. Reson.* **45**: 993–1007. DOI: 10.1007/s00723-014-0579-6.
18. Sato, H., Bottle, S.E., Blinco, J.P., et al. (2008). Electron spin–lattice relaxation of nitroxyl radicals in temperature ranges that span glassy solutions to low-viscosity liquids. *J. Magn. Reson.* **191**: 66–77. DOI: 10.1016/j.jmr.2007.12.003.
19. Nakagawa, K., Candelaria, M.B., Chik, W.W.C., et al. (1992). Electron-spin relaxation times of chromium(V). *J. Magn. Reson.* **98**: 81–91. DOI: 10.1016/0022-2364(92)90111-J.
20. Sato, H., Kathirvelu, V., Fielding, A., et al. (2007). Impact of molecular size on electron spin relaxation rates of nitroxyl radicals in glassy solvents between 100 and 300 K. *Mol. Phys.* **105**: 2137–2151. DOI: 10.1080/00268970701724966.
21. Kathirvelu, V., Eaton, G.R., Eaton, S.S. (2009). Impact of chlorine substitution on spin–lattice relaxation of triarylmethyl and 1,4-benzosemiquinone radicals in glass-forming solvents between 25 and 295 K. *Appl. Magn. Reson.* **37**: 649. DOI: 10.1007/s00723-009-0086-3.
22. Harbridge, J.R., Eaton, S.S., Eaton, G.R. (2003). Electron spin-lattice relaxation processes of radicals in irradiated crystalline organic compounds. *J. Phys. Chem.* **107**: 598–610. DOI: 10.1021/jp021504h.
23. Kathirvelu, V., Sato, H., Eaton, S.S., et al. (2009). Electron spin relaxation rates for semiquinones between 25 and 295 K in glass-forming solvents. *J. Magn. Reson.* **198**: 111–120. DOI: 10.1016/j.jmr.2009.01.026.
24. Krinichnyi, V.I., Pelekh, A.E., Roth, H.-K., et al. (1993). Spin relaxation studies on conducting poly(tetrathiafulvalene). *Appl. Magn. Reson.* **4**: 345–356. DOI: 10.1007/BF03162508.
25. McNamara, L., Zhou, A., Rajh, T., et al. (2023). Realizing solution-phase room temperature quantum coherence in a tetrathiafulvalene-based diradicaloid complex. *Cell Rep. Phys. Sci.* **4**: 101693. DOI: 10.1016/j.xcrp.2023.101693.
26. Eaton, S.S., Huber, K., Elajaili, H., et al. (2017). Electron spin relaxation of a boron-containing heterocyclic radical. *J. Magn. Reson.* **276**: 7–13. DOI: 10.1016/j.jmr.2016.12.013.
27. Koyama, S., Sato, K., Yamashita, M., et al. (2023). Observation of slow magnetic relaxation phenomena in spatially isolated  $\pi$ -radical ions. *Phys. Chem. Chem. Phys.* **25**: 5459–5467. DOI: 10.1039/d2cp06026d.
28. Boudalis, A.K., Constantinides, C.P., Chrysochos, N., et al. (2023). Deciphering the ground state of a  $C_3$ -symmetrical Blatter-type triradical by CW and pulse EPR spectroscopy. *J. Magn. Reson.* **349**: 107406. DOI: 10.1016/j.jmr.2023.107406.
29. Tadzyszak, K., Mrówczyński, R., Carmieli, R. (2021). Electron spin relaxation studies of polydopamine radicals. *J. Phys. Chem. B* **125**: 841–849. DOI: 10.1021/acs.jpcc.0c10485.
30. Kathirvelu, V., Smith, C., Parks, C., et al. (2009). Relaxation rates for spirocyclohexyl nitroxyl radicals are suitable for interspin distance measurements at temperatures up to about 125 K. *Chem. Commun.*, 454–456. DOI: 10.1039/b817758a.

31. Yang, Z., Stein, R.A., Ngendahimana, T., et al. (2020). Supramolecular approach to electron paramagnetic resonance distance measurement of spin-labeled proteins. *J. Phys. Chem. B* **124**: 3291–3299. DOI: 10.1021/acs.jpcc.0c00743.
32. Kuzhelev, A.A., Strizhakov, R.K., Krumkacheva, O.A., et al. (2016). Room-temperature electron spin relaxation of nitroxides immobilized in trehalose: effect of substituents adjacent to no-group. *J. Magn. Reson.* **266**: 1–7. DOI: 10.1016/j.jmr.2016.02.014.
33. Huang, S., Pink, M., Ngendahimana, T., et al. (2021). Bis-spiro-oxetane and bis-spiro-tetrahydrofuran pyrroline nitroxide radicals: synthesis and electron spin relaxation studies. *J. Org. Chem.* **86**: 13636–13643. DOI: 10.1021/acs.joc.1c01670.
34. Huang, S., Paletta, J.T., Elajaili, H., et al. (2017). Synthesis and electron spin relaxation of tetracarboxylate pyrroline nitroxides. *J. Org. Chem.* **82**: 1538–1544. DOI: 10.1021/acs.joc.6b02737.
35. Rajca, A., Kathirvelu, V., Roy, S.K., et al. (2010). A spirocyclohexyl nitroxide amino acid spin label for pulsed EPR spectroscopy distance measurements. *Chem. Eur. J.* **16**: 5778–5782. DOI: 10.1002/chem.200903102.
36. Meyer, V., Swanson, M.A., Clouston, L.J., et al. (2015). Room-Temperature distance measurements of immobilized spin-labeled protein by DEER/PELDOR. *Biophys. J.* **108**: 1213–1219. DOI: 10.1016/j.bpj.2015.01.015.
37. Hyde, J.S., Yin, J.-J., Subczynski, W.K., et al. (2004). Spin-label EPR  $T_1$  values using saturation recovery from 2 to 35 GHz. *J. Phys. Chem. B* **108**: 9524–9529. DOI: 10.1021/jp036329z.
38. Slota, M., Keerthi, A., Myers, W.K., et al. (2018). Magnetic edge states and coherent manipulation of graphene nanoribbons. *Nature* **557**: 691–695. DOI: 10.1038/s41586-018-0154-7.
39. Lombardi, F., Lodi, A., Ma, J., et al. (2019). Quantum units from the topological engineering of molecular graphenoids. *Science* **366**: 1107–1110. DOI: 10.1126/science.aay7203.
40. Lombardi, F., Ma, J., Alexandropoulos, D.I., et al. (2021). Synthetic tuning of the quantum properties of open-shell radicaloids. *Chem* **7**: 1363–1378. DOI: 10.1016/j.chempr.2021.03.024.
44. Chen, J.-S., Trerayapiwat, K.J., Sun, L., et al. (2023). Long-lived electronic spin qubits in single-walled carbon nanotubes. *Nat. Commun.* **14**: 848. DOI: 10.1038/s41467-023-36031-z.
42. Dai, Y., Dong, B., Kao, Y., et al. (2018). Chemical modification toward long spin lifetimes in organic conjugated radicals. *ChemPhysChem* **19**: 2972–2977. DOI: 10.1002/cphc.201800742
43. Hou, L., Zhang, Y., Zhang, Y., et al. (2024). Tunable quantum coherence of luminescent molecular spins organized via block copolymer self-assembly. *Adv. Quantum Technol.* 2400064. DOI: 10.1002/qute.202400064
44. Sun, L., Yang, L., Dou, J.-H., et al. (2022). Room-temperature quantitative quantum sensing of lithium ions with a radical-embedded metal–organic framework. *J. Am. Chem. Soc.* **144**: 19008–19016. DOI: 10.1021/jacs.2c07692.
45. Oanta, A.K., Collins, K.A., Evans, A.M., et al. (2023). Electronic spin qubit candidates arrayed within layered two-dimensional polymers. *J. Am. Chem. Soc.* **145**: 689–696. DOI: 10.1021/jacs.2c11784.
46. Lu, Y., Hu, Z., Petkov, P., et al. (2024). Tunable charge transport and spin dynamics in two-dimensional conjugated metal–organic frameworks. *J. Am. Chem. Soc.* **146**: 2574–2582. DOI: 10.1021/jacs.3c11172.

47. Tesi, L., Stemmler, F., Winkler, M., et al. (2023). Modular approach to creating functionalized surface arrays of molecular qubits. *Adv. Mater.* **35**:2208998.
48. Poryvaev, A.S., Gjuzi, E., Polyukhov, D.M., et al. (2021). Blatter-radical-grafted mesoporous silica as prospective nanoplatform for spin manipulation at ambient conditions. *Angew. Chem. Int. Ed.* **60**: 8683–8688. DOI: 10.1002/anie.202015058.
